# Supplementary material
Source: HighWire-hosted journal article supplement (https://www.ajnr.org/highwire/filestream/93749/field_highwire_adjunct_files/0/0395.pdf)
Supplement: 0395.pdf [file 0395.pdf]

Online Supplemental Data

Online Figures

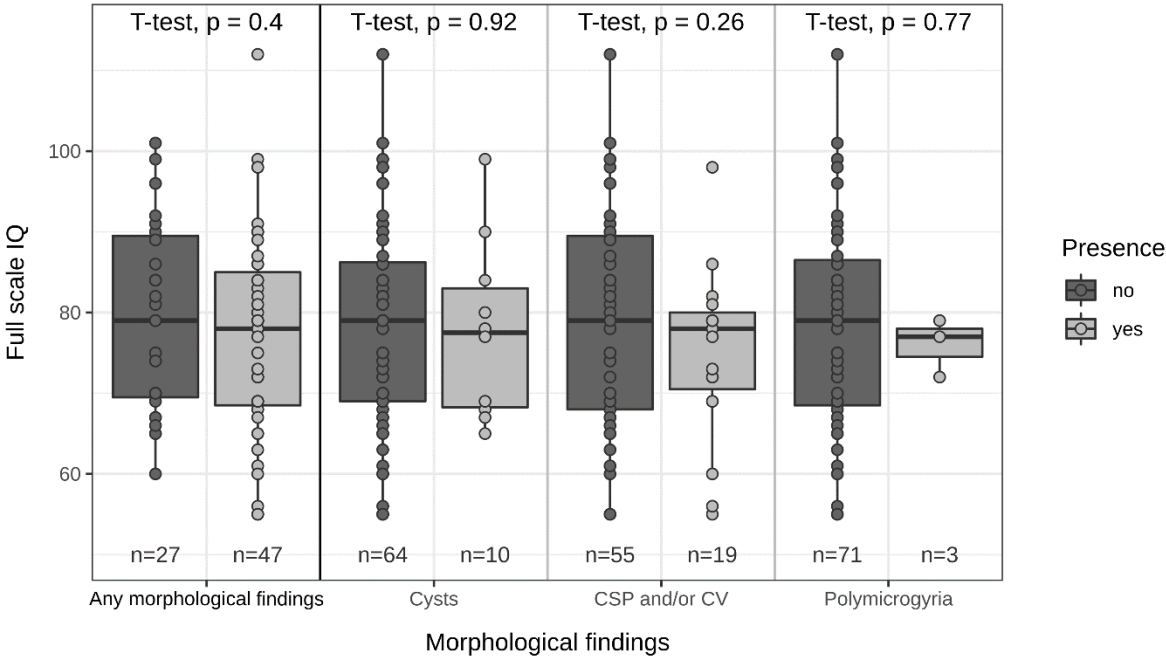

Online Figure 1 Association between occurrence of all findings summed together/single findings and Full scale IQ

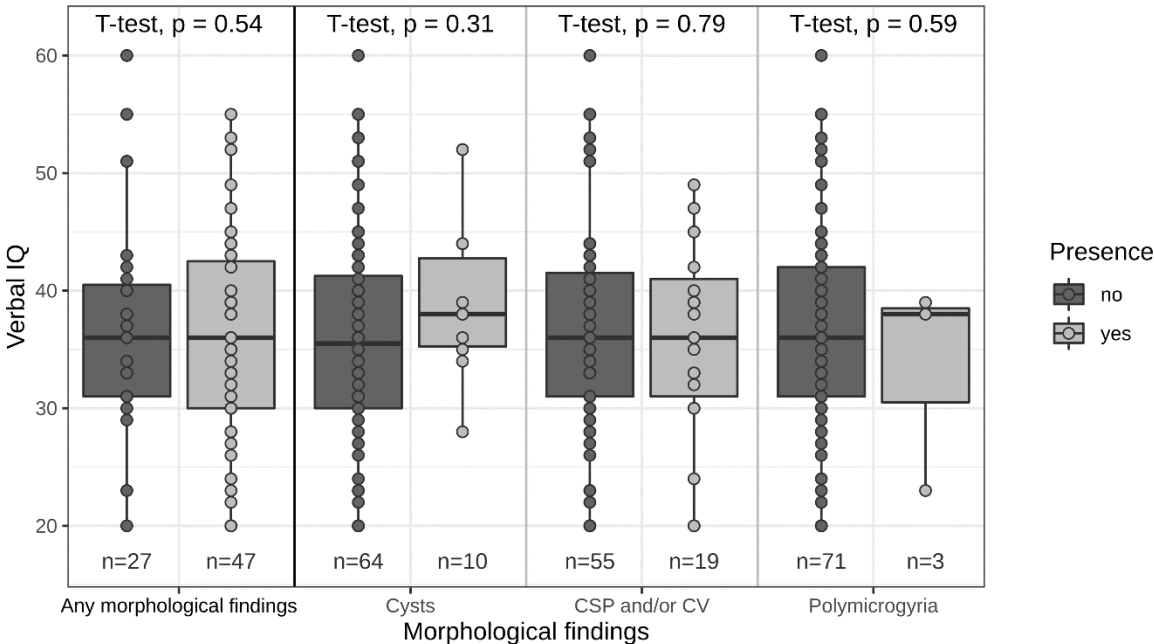

Online Figure 2 Association between occurrence of all findings summed together/single findings and Verbal IQ T-score

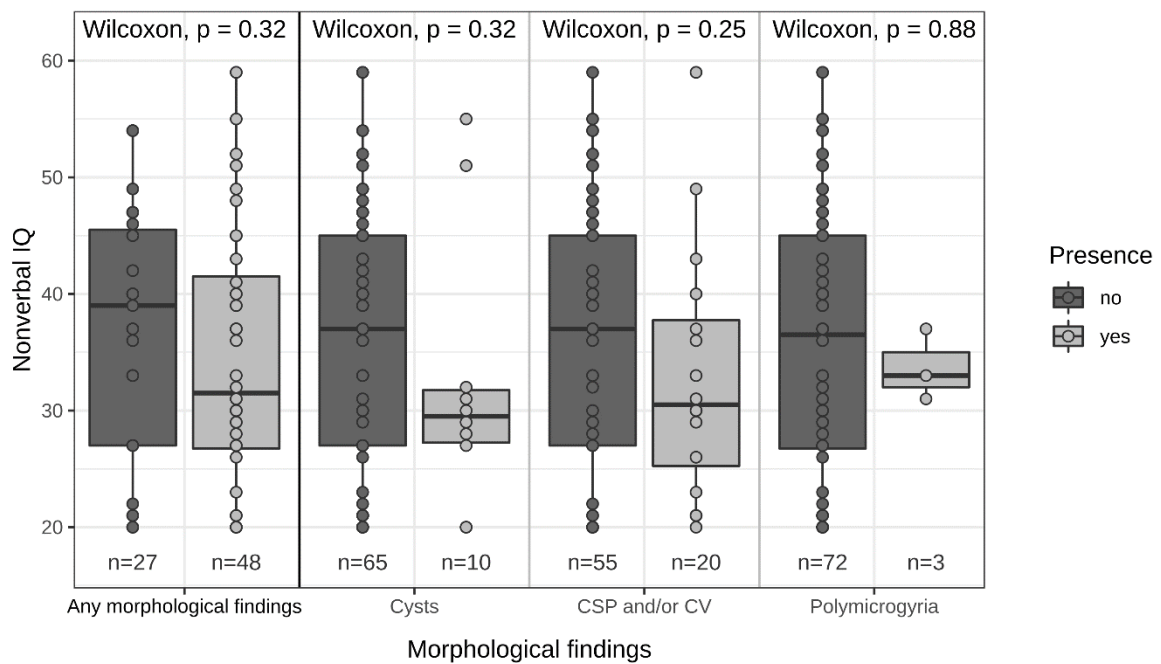

**Online Figure 3** Association between occurrence of all findings summed together/single findings and Nonverbal IQ T-score

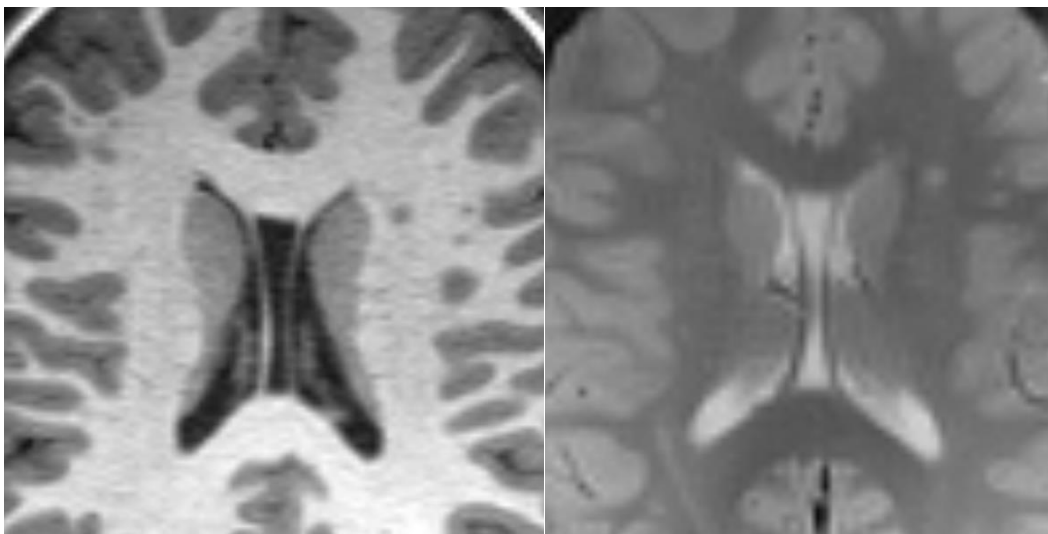

**Online Figure 4** Left, a 3D T1WI of bihemispheric, frontally emphasized heterotopia in the white matter that are isointense to the cortex. On the right, the T2\*WI in which most of the heterotopia are also visible and isointense to the cortex. In addition, a cavum septi pellucidum et vergae is seen.

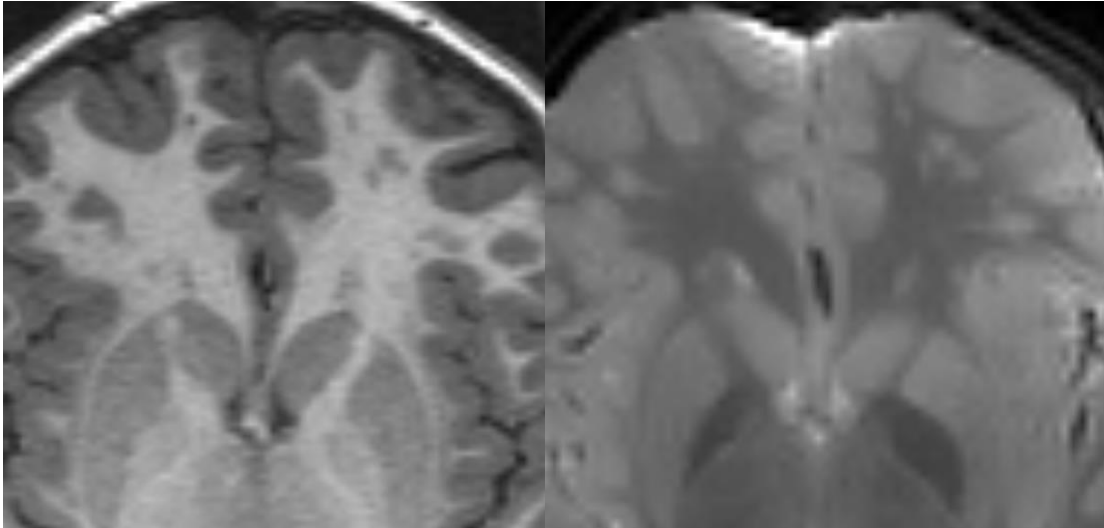

**Online Figure 5** Left, a 3D T1WI of bihemispheric, frontally emphasized heterotopia in the white matter that are isointense to the cortex. On the right, the T2\*WI in which most of the heterotopia are also visible and isointense to the cortex.

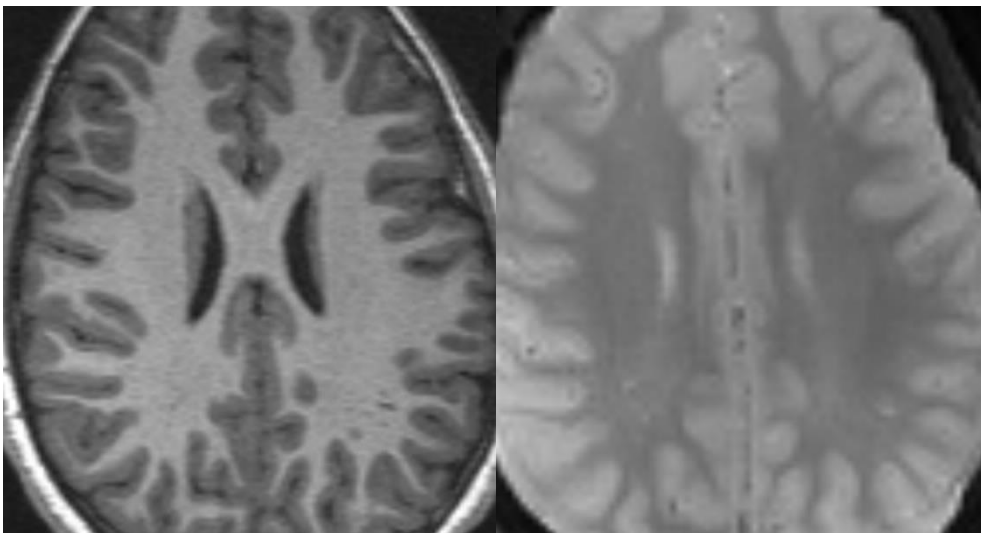

**Online Figure 6** Left, a 3D T1WI of a healthy volunteer with heterotopia-like lesions in the white matter. The distribution pattern is different from that in subjects with 22q11.2DS, as described already in the results section. However, adding the T2\*WI (right) additionally shows that the lesions are isointense to the CSF rather than to the cortex, suggesting that these are not heterotopia but rather enlarged perivascular spaces.

## Online Tables

**Online Table 1.** Degree of association between variables

|             | Cysts |                                                     | CSP <sup>3</sup> and/or CV <sup>4</sup> |                                                     |
|-------------|-------|-----------------------------------------------------|-----------------------------------------|-----------------------------------------------------|
|             | OR    | p-value <sup>1</sup> ,<br>FDR <sup>2</sup> adjusted | OR                                      | p-value <sup>1</sup> ,<br>FDR <sup>2</sup> adjusted |
| Heterotopia | 5.86  | 0.11                                                | 0.75                                    | 0.61                                                |
| Cysts       |       |                                                     | 0.27                                    | 0.41                                                |

<sup>1</sup>Statistical tests performed: Fisher's exact test, <sup>2</sup>False Discovery Rate, <sup>3</sup>Cavum septi pellucidi, <sup>4</sup>Cavum Vergae

**Online Table 2.** P-values of multivariate logistic regression by morphological findings and psychiatric diagnoses in individuals with 22q11.2DS

| p-value           | Heterotopia | CSP <sup>1</sup> and/or CV <sup>2</sup> | Cysts |
|-------------------|-------------|-----------------------------------------|-------|
| ADHD <sup>3</sup> | 0.81        | 0.35                                    | 0.90  |
| ASD <sup>4</sup>  | 0.18        | 0.94                                    | 0.24  |
| Anxiety disorder  | 0.16        | 0.08                                    | 0.16  |

<sup>1</sup>Cavum septi pellucidi, <sup>2</sup>Cavum Vergae, <sup>3</sup>Autism Spectrum Disorder, <sup>4</sup>Attention-Deficit/Hyperactivity Disorder
